# Supplementary material
Source: publisher figshare collection journal article supplement (https://frontiersin.figshare.com/ndownloader/files/13113395)
Supplement: Supplementary file [file 13113395]

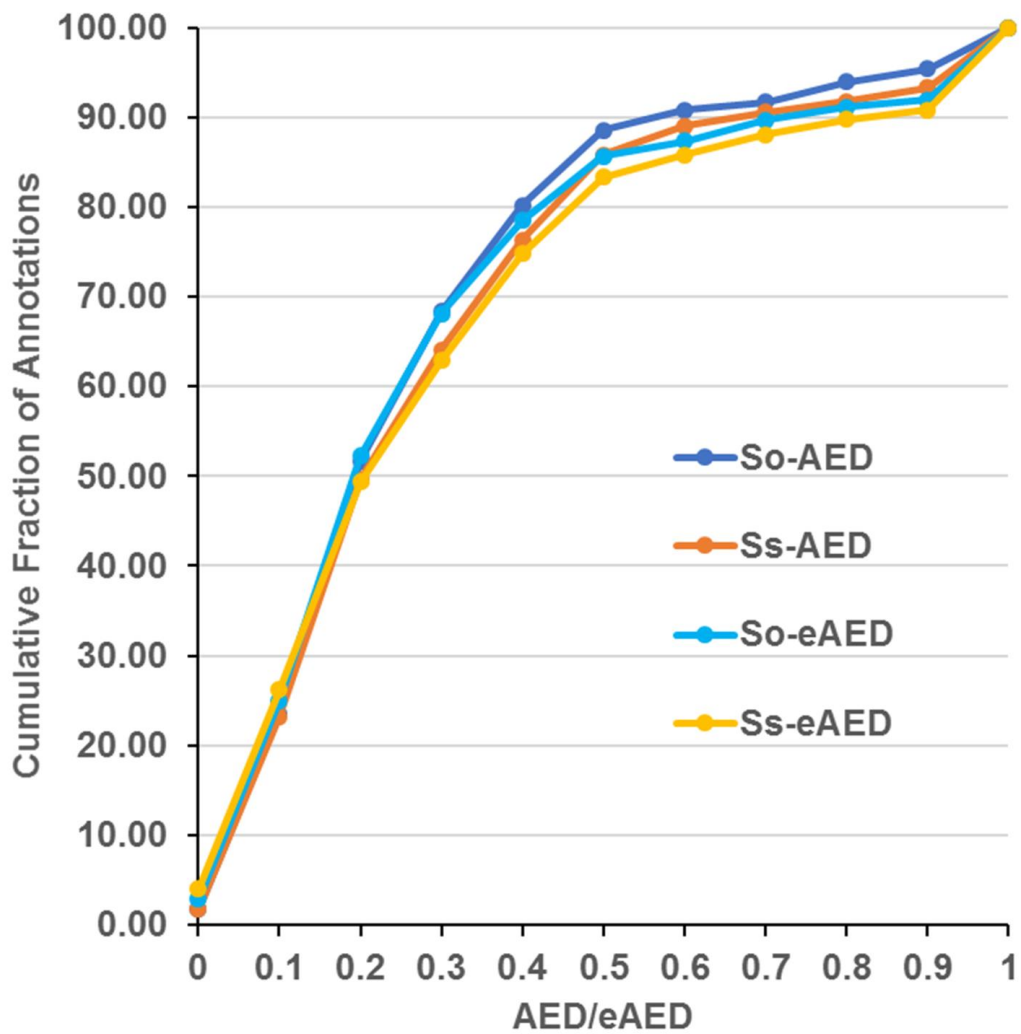

**Supplementary Figure S1.** Quality of gene model annotation in So and Ss BACs. The cumulative fraction of annotations (Y axis) are plotted against the AED scores (X axis). Approximately 86% of gene models in Ss BACs and 89% of gene models from So BACs had  $AED \leq 0.5$ .
